# Supplementary material for: Polymorphisms in Phase I and Phase II genes and breast cancer risk and relations to persistent organic pollutant exposure: a case–control study in Inuit women
Source: PubMed Central journal article supplement (PMC4234380; doi:10.1186/1476-069x-13-19), 2014-03-16
Supplement: 1476-069X-13-19-S1.pdf [file 1476-069X-13-19-S1.pdf]

Additional Table 1. Demographic, lifestyle and reproductive characteristics of breast cancer patients and controls

| Parameters                               | Cases      |        |             |           | Controls   |        |              |           | p value           |
|------------------------------------------|------------|--------|-------------|-----------|------------|--------|--------------|-----------|-------------------|
|                                          | N (n)      | median | 95% CI      | Min-max   | N (n)      | median | 95% CI       | Min-max   |                   |
| <b>Demographic and lifestyle factors</b> |            |        |             |           |            |        |              |           |                   |
| Age (years)                              | 31 (31)    | 50     | 46.1; 56.7  | 29.0-80.0 | 115 (115)  | 54     | 49.1; 53.5   | 18-66     | 0.34              |
| ≤ 50                                     | 17 (54.8%) |        |             |           | 37 (32.2%) |        |              |           |                   |
| 51-55                                    | 3 (9.70%)  |        |             |           | 26 (22.6%) |        |              |           |                   |
| 56-59                                    | 3 (9.70%)  |        |             |           | 17 (14.8%) |        |              |           |                   |
| ≥60                                      | 8 (25.8%)  |        |             |           | 35 (30.4%) |        |              |           |                   |
| BMI (kg/m <sup>2</sup> )                 | 31 (13)    | 26.9   | 24.0; 29.1  | 16.5-34.4 | 115 (115)  | 26.4   | 26.4;27.2    | 16.6-43.4 | 0.69              |
| <25                                      | 4          | 23.5   | 16.0; 22.3  | 16.5-25.0 | 42         | 23.0   | 21.7;23.0    | 16.1-25.0 | 0.84              |
| 25-29                                    | 8          | 27.6   | 26.6; 28.9  | 25.8-29.6 | 42         | 27.6   | 26.9;27.8    | 25.1-19.9 | 0.46              |
| ≥ 30                                     | 1          | 34.4   | -           | -         | 31         | 33.2   | 33.1; 35.9   | 30.3-43.4 | -                 |
| n-3/n-6                                  | 31 (29)    | 0.5    | 0.4; 0.6    | 0.2-1.7   | 115 (115)  | 0.5    | 0.5; 0.7     | 0.1-2.2   | 0.31              |
| Serum cotinine (ng / ml)                 | 31 (28)    | 11.6   | 33.3; 140.0 | 0-600.0   | 115 (96)   | 120    | 121.0; 188.0 | 0.0-799.0 | 0.052             |
| Smoking status                           | 31 (26)    |        |             |           | 115 (115)  |        |              |           | 0.77              |
| <i>Never</i>                             | 5 (19.2%)  |        |             |           | 21 (18.3%) |        |              |           |                   |
| <i>Former</i>                            | 3(11.5%)   |        |             |           | 20 (17.4%) |        |              |           |                   |
| <i>Current</i>                           | 18 (69.2%) |        |             |           | 74 (64.3%) |        |              |           |                   |
| <b>Reproductive factors</b>              |            |        |             |           |            |        |              |           |                   |
| Total number of full term pregnancies    | 31(16)     | 2.0    | 1.7; 2.8    | 1-4       | 115 (89)   | 3.0    | 3.2; 4.1     | 0.0-11.0  | <b>&lt;0.0001</b> |
| Ever breastfed                           | 31(17)     |        |             |           | 115 (85)   |        |              |           |                   |
| Yes (%)                                  | 15 (88.2%) |        |             |           | 76 (89.4%) |        |              |           | 0.89              |
| Menopausal status <sup>#</sup>           | 31         |        |             |           | 115        |        |              |           |                   |
| Premenopausal (%)                        | 17 (54.8%) |        |             |           | 42 (36.5%) |        |              |           | 0.098             |
| Postmenopausal (%)                       | 14 (45.2%) |        |             |           | 73 (63.5%) |        |              |           |                   |
| Serum E2 (nmol / l)                      | 31(24)     | 0.09   | 0.09; 0.23  | 0.03-0.51 | 115(59)    | 0.07   | 0.05; 0.16   | 0.01-1.59 | 0.10              |
| Premenopausal                            | 11         | 0.21   | 0.13; 0.34  | 0.03-0.44 | 11         | 0.13   | 0.05; 0.55   | 0.12-1.59 | 0.52              |
| Postmenopausal                           | 13         | 0.06   | 0.02; 0.17  | 0.03-0.51 | 48         | 0.07   | 0.06; 0.08   | 0.01-0.17 | 0.73              |

N: total number of subjects, n: number of subjects having information for the corresponding parameters.

BMI: body mass index

#: Menopausal status was unknown for 36 of the samples (11 cases and 26 controls): among these, 31 women were between 18-42 years old and 5 women between 66-80 years old. In this study, women who had missing information on menopausal status were designated premenopausal if they were between 18-42 years old, and considered postmenopausal if they were between 66-80 years old.

Additional Table 2. Odds ratios of breast cancer and 95% confidence intervals associated with ln-transformed PFOS and PFOA among breast cancer patients and controls (ln-PFOS and ln-PFOA as continuous variables)

| Gene                         | Genotype                | Exposure | N (ca/co) | Age adjusted | 95% CI    | p     |
|------------------------------|-------------------------|----------|-----------|--------------|-----------|-------|
| <i>CYP1A1</i><br>(Ile462Val) | Ile/Ile                 | PFOS     | 4/28      | 1.71         | 0.47-6.32 | 0.418 |
|                              | Ile/Val+Val/Val         | PFOS     | 26/68     | 2.63         | 1.46-4.75 | 0.001 |
|                              | Ile/Ile                 | PFOA     | 4/28      | 1.01         | 0.26-3.88 | 0.993 |
|                              | Ile/Val+Val/Val         | PFOA     | 26/68     | 1.79         | 0.97-3.32 | 0.064 |
|                              | Ile/Ile                 | PCBs     | 4/32      | .68          | 0.12-3.76 | 0.663 |
|                              | Ile/Val+Val/Val         | PCBs     | 25/81     | 1.05         | 0.50-2.19 | 0.898 |
|                              | Ile/Ile                 | OCPs     | 4/32      | 0.78         | 0.17-3.50 | 0.747 |
| <i>CYP1B1</i><br>(Leu432Val) | Ile/Val+Val/Val         | OCPs     | 25/81     | 1.72         | 0.76-3.89 | 0.193 |
|                              | Leu/Leu                 | PFOS     | 26/66     | 1.95         | 1.09-3.48 | 0.025 |
|                              | Leu/val+Val/Val         | PFOS     | 5/28      | 8.67         | 1.33-56.6 | 0.024 |
|                              | Leu/Leu                 | PFOA     | 26/66     | 1.15         | 0.64-2.07 | 0.645 |
|                              | Leu/val+Val/Val         | PFOA     | 5/28      | 10.10        | 1.25-81.3 | 0.030 |
|                              | Leu/Leu                 | PCBs     | 26/79     | 0.97         | 0.47-2.02 | 0.937 |
|                              | Leu/val+Val/Val         | PCBs     | 4/32      | 0.39         | 0.04-3.59 | 0.408 |
| <i>COMT</i><br>(Val158Met)   | Leu/Leu                 | OCPs     | 26/79     | 1.50         | 0.67-3.36 | 0.320 |
|                              | Leu/val+Val/Val         | OCPs     | 4/32      | 1.08         | 0.20-5.70 | 0.931 |
|                              | Val/Val                 | PFOS     | 7/17      | 2.70         | 0.83-8.79 | 0.100 |
|                              | Val/Met+Met/Met         | PFOS     | 24/79     | 2.65         | 1.44-4.89 | 0.002 |
|                              | Val/Val                 | PFOA     | 7/17      | 1.10         | 0.34-3.40 | 0.909 |
|                              | Val/Met+Met/Met         | PFOA     | 24/79     | 1.88         | 0.98-3.60 | 0.055 |
|                              | Val/Val                 | PCBs     | 6/19      | 1.96         | 0.33-11.6 | 0.457 |
| <i>CYP17</i><br>(-34T>C)     | Val/Met+Met/Met         | PCBs     | 24/94     | 1.00         | 0.49-2.05 | 0.994 |
|                              | Val/Val                 | OCPs     | 6/19      | 2.64         | 0.32-21.1 | 0.368 |
|                              | Val/Met+Met/Met         | OCPs     | 24/94     | 1.53         | 0.72-3.25 | 0.267 |
|                              | A1A1                    | PFOS     | 12/22     | 4.89         | 1.28-18.7 | 0.020 |
|                              | A1A2+A2A2               | PFOS     | 18/74     | 2.21         | 1.19-4.12 | 0.013 |
|                              | A1A1                    | PFOA     | 12/22     | 2.11         | 0.73-6.01 | 0.166 |
|                              | A1A2+A2A2               | PFOA     | 18/74     | 1.48         | 0.76-2.89 | 0.252 |
| <i>CYP19</i><br>(C>T)        | A1A1                    | PCBs     | 12/24     | 1.56         | 0.55-4.45 | 0.402 |
|                              | A1A2+A2A2               | PCBs     | 17/89     | 0.94         | 0.39-2.23 | 0.886 |
|                              | A1A1                    | OCPs     | 12/24     | 1.74         | 0.53-5.67 | 0.361 |
|                              | A1A2+A2A2               | OCPs     | 17/89     | 1.68         | 0.68-4.15 | 0.259 |
|                              | CC                      | PFOS     | 23/63     | 2.65         | 1.39-5.06 | 0.003 |
|                              | CT+TT                   | PFOS     | 8/34      | 2.54         | 0.92-7.04 | 0.073 |
|                              | CC                      | PFOA     | 23/63     | 1.37         | 0.71-2.63 | 0.346 |
| <i>CYP19_TTTA</i><br>(TTTA)n | CT+TT                   | PFOA     | 8/34      | 2.47         | 0.82-7.42 | 0.106 |
|                              | CC                      | PCBs     | 22/79     | 1.07         | 0.51-2.26 | 0.862 |
|                              | CT+TT                   | PCBs     | 8/35      | 1.16         | 0.32-4.21 | 0.821 |
|                              | CC                      | OCPs     | 22/79     | 1.55         | 0.70-3.41 | 0.279 |
|                              | CT+TT                   | OCPs     | 8/35      | 1.90         | 0.45-7.99 | 0.380 |
|                              | (TTTA) <sub>8-10</sub>  | PFOS     | 27/64     | 2.58         | 1.40-4.75 | 0.002 |
|                              | (TTTA) <sub>11-13</sub> | PFOS     | 4/24      | 41.9         | 0.42-4203 | 0.112 |
| <i>CYP19_TTTA</i><br>(TTTA)n | (TTTA) <sub>8-10</sub>  | PFOA     | 27/64     | 1.30         | 0.72-2.34 | 0.381 |
|                              | (TTTA) <sub>11-13</sub> | PFOA*    | 4/24      | 1.88         | 0.48-7.33 | 0.363 |
|                              | (TTTA) <sub>8-10</sub>  | PCBs     | 26/76     | 1.05         | 0.51-2.18 | 0.892 |
|                              | (TTTA) <sub>11-13</sub> | PCBs     | 4/25      | 1.54         | 0.23-10.3 | 0.657 |
|                              | (TTTA) <sub>8-10</sub>  | OCPs     | 26/76     | 1.65         | 0.75-3.63 | 0.215 |
|                              | (TTTA) <sub>11-13</sub> | OCPs     | 4/25      | 1.97         | 0.27-14.3 | 0.504 |

Ca: case; Co: control ; CI: Confidence interval; OCPs: sum of 8 organochlorine pesticides; PCBs: sum of 12 PCBs
